# Supplementary material for: Estimating growth patterns and driver effects in tumor evolution from individual samples
Source: PubMed Central journal article supplement (PMC7002450; doi:10.1038/s41467-020-14407-9), 2020-02-05
Supplement: 41467_2020_14407_MOESM2_ESM.pdf [file 41467_2020_14407_MOESM2_ESM.pdf]

1 Estimating growth patterns and driver effects in tumor evolution from individual samples

2 Salichos et al. 2019

3

4

5

6

7

8

9

10

11

12

13

14

15

16

17

18

19

20

21

22

23

24

## 25 **Supplementary Notes**

26 Supplementary note 1. Variant allele frequency (VAF): The fraction of sequencing reads  
27 overlapping a genomic coordinate that support the non-reference allele. This fraction can be  
28 further normalized based on the sample's ploidy and purity.

29 Supplementary note 2. Variant call format (VCF) file: A text file format that includes sequencing  
30 information such as the position and frequency of every mutation in the sample.

31 Supplementary note 3. Subclone: Cells that belong to a single lineage during population growth.  
32 Within the subclone, a higher mutational frequency is associated with an earlier time of I.

33 Supplementary note 4. Linear subclones: Population growth where every subclone has at most  
34 one child subclone (e.g., Subclone A -> Subclone B -> Subclone C).

35 Supplementary note 5. Fitness mutation: A mutation that increases the growth of the population.  
36 Typically, a fitness mutation might lead to the formation of a subclone. A fitness mutation does  
37 not necessarily induce tumorigenesis.

38 Supplementary note 6. PCAWG drivers<sup>1</sup>: In our analysis, we used state-of-the-art driver  
39 detection by the PCAWG consortium.

40 Supplementary note 7. Generational hitchhiker (g-hitchhiker): A hitchhike mutation that occurred  
41 before the fitness mutation. These mutations have increased VAF (higher than their respective  
42 fitness mutation) and represent generational time as their respective branching lineages typically  
43 have low VAF (see Figure 1).

44 Supplementary note 8. Growth  $r$ : Before a fitness mutation, the population grows at a rate  $r$ . In  
45 our model, we used the prevalence of generational hitchhikers to estimate growth  $r$ .

46 Supplementary note 9. Scalar effect  $k_i$ : After the fitness mutation  $i$  occurs, the population grows  
47 at rate  $k_i \times r$ .

48 Supplementary note 10. Projected scalar effect  $k^*$ : Scalar effect  $k$  is projected by considering a  
49 larger population size when implementing our method directly in equation

$$50 \quad f_g(T, t_g, t_i - m) = \frac{e^{-r(t_g + t_i - m) \times (N_{\text{tot}} - f_{d(T, t_i)} \times N_{\text{tot}} + \sqrt{f_{d(T, t_i)} \times N_{\text{tot}}}) + f_{d(T, t_i)} \times N_{\text{tot}} - \sqrt{f_{d(T, t_i)} \times N_{\text{tot}}}}{N_{\text{tot}}} [1].$$

51 In our script the user is allowed to enter their own estimate of population size  $N_{\text{tot}}$  to  
52 obtain projected  $k$  values.

53 Supplementary note 11. Projected selection coefficient  $s^*$ : Similar to  $k^*$ , we use population  
54 genetics theory to project simulated selection coefficient  $s$  for larger population sizes.

55 Supplementary note 12. Frequency  $F_i$ : The frequency of mutation  $i$  at the time of sequencing.

56 Supplementary note 13. Frequency function  $f_g(t_g, t_{i-m}, r, k)$ : The function that describes the  
57 frequency  $F_{i-m}$  for  $m$  g-hitchhikers occurring before the fitness mutation  $i$ .

58 Supplementary note 14. Generational time  $t_g$ : A time specific re-optimized constant to calibrate  
59 generational time for  $m$  respective g-hitchhikers. This is a very important twist of our method,  
60 allowing to localize the effect timewise without considering past events including copy number  
61 variations or other VAF perturbations.

62 Supplementary note 15. Growth vector: For each mutation  $i > m$  in the tumor sample, we  
63 estimated growth  $r_{i-1}$ .

64 Supplementary note 16. Effect vector: For each mutation  $i > m$  in the tumor sample, we estimated  
65 its fitness effect  $k_i$ .

66 Supplementary note 17. Peak vector: Local peaks for a vector that correspond to fitness  
67 mutations with highest growth effect  $k_i \times r_{i-1}$ .

68 Supplementary note 18. Optimizing function: For  $m$  g-hitchhikers occurring before mutation  $i$ ,  
69 we used a nonlinear least square fitting to calculate effect  $k_i$  and generational time  $t_g$ .

70 Supplementary note 19. Vogelstein cancer genes<sup>2</sup>: Our Vogelstein list consists of 71 tumor  
71 suppressor genes and 54 oncogenes.

72 Supplementary note 20. Tumor Suppressor Genes from Vogelstein list: *ACVR1B, APC, ARID1A,*  
73 *ARID1B, ARID2, ASXL1, ATM, ATRX, AXIN1, B2M, BAP1, BCOR, BRCA1, BRCA2, CASP8,*  
74 *CDC73, CDH1, CDKN2A, CEBPA, CIC, CREBBP, CYLD, DAXX, EP300, FAM123B, FBXW7,*  
75 *FUBP1, GATA1, GATA3, HNF1A, KDM5C, KDM6A, MAP3K1, MEN1, MLH1, MLL2, MLL3,*  
76 *MSH2, MSH6, NCOR1, NF1, NF2, NOTCH1, NOTCH2, NPM1, PAX5, PBRM1, PHF6,*  
77 *PIK3R1, PRDM1, PTCH1, PTEN, RB1, RNF43, RUNX1, SETD2, SMAD2, SMAD4, SMARCA4,*  
78 *SMARCB1, SOCS1, SOX9, STAG2, STK11, TET2, TNFAIP3, TRAF7, TP53, TSC1, VHL, WT1*

79 Supplementary note 21. Oncogenes from Vogelstein list: *ABL1, AKT1, ALK, AR, BCL2, BRAF,*  
80 *CARD11, CBL, CRLF2, CSF1R, CTNNB1, DNMT1, DNMT3A, EGFR, RBB2, EZH2, FGFR2,*  
81 *FGFR3, FLT3, FOXL2, GATA2, GNA11, GNAQ, GNAS, H3F3A, HIST1H3B, HRAS, IDH1,*  
82 *IDH2, JAK1, JAK2, JAK3, KIT, KLF4, KRAS, MAP2K1, MED12, MET, MPL, MYD88, NFE2L2,*  
83 *NRAS, PDGFRA, PIK3CA, PPP2R1A, PTPN11, RET, SETBP1, SF3B1, SMO, SPOP, SRSF2,*  
84 *TSHR, U2AF1*

85 Supplementary note 22. Random gene list, comparable to Vogelstein gene list. To create a  
86 ‘random gene list’ comparable to the Vogelstein gene list, we randomly selected non-Vogelstein  
87 genes that had a similar number of mutations in the PCAWG database. *SLCO1B1, PDZD4,*  
88 *OPA1, ABCC9, FRAS1, PSME4, MYCBP2, DCAF4L2, GRID2, OR2G6, NALCN, MYLK,*  
89 *ITGA10, ASAP3, ZNF844, CNTNAP4, WDR90, ADAMTS20, CDH17, TRPM3, FLT1, LY9,*  
90 *GJA8, MAT1A, SLCO1A2, RBP3, GOLGA7, FANCM, DYSF, GNAO1, ADAMTS8, MXRA5,*  
91 *APBA1, RNF214, NHSL1, SYT7, MYC, NBEAL2, DDIT1, GPR116, CNTN1, PASD1, PHLPP2,*  
92 *FAM47B, MAGEF1, PLOD1, KDM4E, RXRB, KIAA1211L, HSD3B7, C12orf54, ERBB4,*

93 *ADIPOQ, GFAP, SLC5A7, BAIAP2L1, KIF7, ATHL1, BEST3, PLXNC1, MROH7, KCNH8,*  
94 *SYCP2, CYFIP2, ARHGEF16, FLG, ZFX, ITGA4, CXorf22, BTK, PREX1, PKN2, FILIP1L,*  
95 *CPXCRI, OSBPL6, KCNH1, COL21A1, ABCB5, NACA, PLCL1, ZNF804A, PLCB1, HMSD,*  
96 *ARHGEF4, DSG3, PCDHB4, PCDHA4, ARHGDIB, ANK3, ADAMTS10, THBS2, WNK2, EML6,*  
97 *PIMI, PCSK5, MUC22, MGA, LRRIQ1, FN1, HRNR, MYH13, LPHN2, TNC, PTPRZ1,*  
98 *PKD1L1, ASPM, KCNQ3, CENPF, KCNT2, VPS13C, VNN3, NWD1, AKAP9, KIAA1549,*  
99 *C10orf71, MUC16, SGK1, GRM3, HSPG2, ZFH3, FREM3, CDH10S*

100 Supplementary note 23. On tumor linearity: To minimize subclonal entanglements that could  
101 affect our calculations and to facilitate our sliding window analysis, we selected 993 whole  
102 genome sequenced tumors from PCAWG that were linear, in that no subclone had two children  
103 subclones based on PhyloSub<sup>3</sup>. PhyloSub provides the clonal branching history, allowing us to  
104 determine of clonal evolution. However, our method could also be applied to early (parent)  
105 subclones.

106

## 107 **Supplementary Methods**

108 Simulation analysis using the Gillespie algorithm. We used a stepwise time-branching process to  
109 model the growth of a single transformed cell into a tumor with a dominant subclone. The  
110 workhorse of our simulations is the Gillespie algorithm<sup>4</sup>, which has frequently been used to  
111 simulate stochastically dividing cells. In the simulations of our main analyses, there are two  
112 kinds of cells: clonal cells and driver subclone cells, where driver subclone cells carry an  
113 additional driver not present in the original tumor cell of a simulation. Each run of a simulation  
114 proceeds as a series of events until the stop condition is met. Each event has an associated event  
115 type, parental cell, and duration, and each of these three attributes of the event are drawn

116 randomly. In the simulations of our main analyses, there are 5 possible event types: 1) one clonal  
117 cell divides into two clonal cells; 2) one clonal cell divides into a clonal cell and a subclonal cell;  
118 3) one subclonal cell divides into two subclonal cells; 4) a clonal cell dies; and 5) a subclonal cell  
119 dies. To determine which event type is associated with a given event, one of the event types is  
120 sampled at random, according to weights that reflect the state of the tumor.

121 The weight for event type 1 (one clonal cell becoming two clonal cells) is the sum of the birth  
122 rates of all clonal cells, which is in turn typically 1; hence, the weight for event type 1 is  
123 typically equal to the number of clonal cells in the tumor at a given time. Similarly, the weight  
124 for event type 3 (one subclonal cell becoming two subclonal cells) is the sum of the birth rates of  
125 all subclonal cells, which is in turn typically  $k$ ; hence, the weight for event type 3 is typically  $k$   
126 times the number of subclonal cells in the tumor at a given time. The weight for event type 4 (the  
127 death of a clonal cell) in the main analyses follows a logistic paradigm: the total number of cells  
128 in the tumor, divided by the tumor's carrying capacity, (which gives the death rate of a single  
129 cell) and then multiplied by the number of clonal cells in the tumor (which gives the total death  
130 rate across all clonal cells). The weight for event type 5 (the death of a subclonal cell) is identical  
131 except that the number of subclonal cells is used in place of the number of clonal cells. Event  
132 type 2 (one clonal cell becomes one clonal cell and one subclonal cell) is special and occurs only  
133 once per simulation when some threshold minimum number of mutations per cell has been  
134 achieved. This ensures good mutation accumulation. Once this threshold is reached, event type 2  
135 has a 10% chance of occurring per turn. Event type 2 has also a weight of 0 once the subclonal  
136 driver has appeared. If the last surviving cell of the subclone would be killed by a sampled event  
137 type, the event type is re-rolled. Event types 1, 2, and 3 involve the splitting of a cell into two

138 cells. These two cells inherit all the mutations of the parental cell and, in the main analysis,  
139 acquire one new mutation as well.

140 Each event type is associated with one parental cell type, with some redundancy. Event types 1,  
141 2, and 4 involve a clonal parental cell type. Event types 3 and 5 involve a subclonal parental cell  
142 type. The parent cell for the event is randomly drawn from all cells that match the involved  
143 parental cell type, with uniform weights assigned to the various instances of that cell type. The  
144 duration of the event (or rather, the time elapse between the preceding event and the current  
145 event) is sampled from the exponential decay function with a mean equal to the reciprocal of the  
146 sum of the weights of all event types, in accordance with the Gillespie algorithm. Effectively,  
147 this method samples time frequently when the tumor is large and subject to high rates of birth  
148 and death, and samples time infrequently when the tumor is small or slow. The simulation ends  
149 after the driver subclone reaches a critical prevalence.

150 Neutral and non-neutral simulations based on Williams et al. 2016, 2018<sup>5,6</sup>. To benchmark our  
151 model on an independent simulation dataset, we applied our method on a) 140 neutral  
152 simulations of tumor progression and b) 360 non-neutral simulations for various growth  
153 scenarios, generated from the validated simulation software for neutral tumors from Williams et  
154 al. 2016 and for non-neutral tumors from Williams et al. 2018. These scripts have the advantage  
155 of being existing, validated tools, but the limitation of being constrained by the models used by  
156 their authors. In both the neutral and non-neutral tumors, the tumor starts as a single transformed  
157 cell, which as with its descendants, divides stochastically to form a growing tumor. Each cell  
158 division was set to produce an average of 10 mutations per haploid genome, and read depth of  
159 simulated sequencing was 1000x. For the non-neutral tumors, the probability of division a cell in  
160 the fitter subclone is modified by a selection coefficient drawn from a complex distribution

161 determined by the package. Subclones were grown to either low, medium, or high prevalence  
162 corresponding to prevalence ranges 0.1 to 0.2, 0.2 to 0.3, and 0.3 to 0.4 VAFs, respectively. For  
163 non-neutral growth we used CancerSeqSim, while for neutral growth we used ‘neutral-tumor-  
164 evolution’ packages. For neutral and non-neutral growth, we used mutations with min true VAF  
165 0.01 and 0.05 respectively. In these analyses, simulated drivers correspond to a pre-chosen  $1+s$   
166 selection coefficient, while scalar  $k$  represents our method’s predictions. We also used population  
167 projections to increased cell-population sizes up to 1 billion cells. Coefficients  $s^*$  and scalars  $k^*$   
168 represent projected values to higher populations sizes. For calculating  $s^*$  we used population  
169 genetic models (see below), while for  $k^*$  we modified the population size in our method’s code.  
170 However, when running our code, the user can provide their own population size estimate, either  
171 using the number of mutations as proxy, or by an intelligent guess. Varying population sizes did  
172 not burden our method’s detectability, but do provide a decreased  $s^*$  and  $k^*$  as expected. Our  
173 default analysis included a population size of 10,000 cells, medium VAFs, a range of selection  
174 coefficients between  $0 < s < 34$ , a sequencing coverage of 1000x and an optimal hitchhiker  
175 sliding window size of 150 mutations. The hitchhiker window size was optimized using our  
176 neutral simulations and a range of window sizes until their median effect peaks has a median of  
177 1, for the corresponding population size and sequencing coverage. A sliding window size of 100  
178 hitchhiker mutations provided higher predicted scalar effects  $k$  for both neutral and non-neutral  
179 simulations, without burdening our method’s ability to detect drivers.

180

181 **Supplementary Figures**



**a** Norm. growth and mutational scalar  $k$  during a Birth-and-Death (BnD) tumor simulation

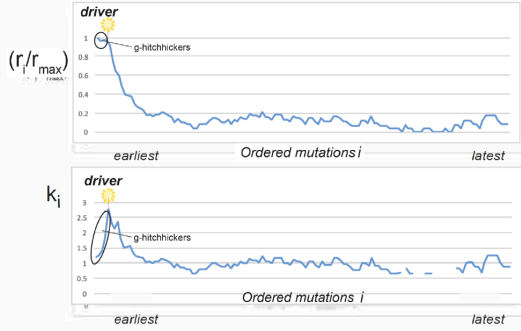

**b** Median predicted values for scalars  $k=2, 3$  and  $4$ , using different growth models

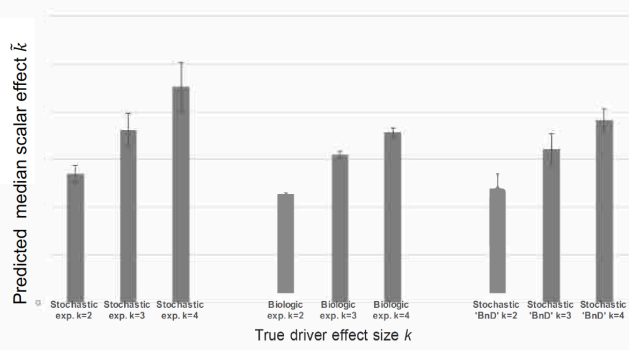

**c** Median distance  $\tilde{D}$  from true driver under a 'BnD' model for different scalar  $k$

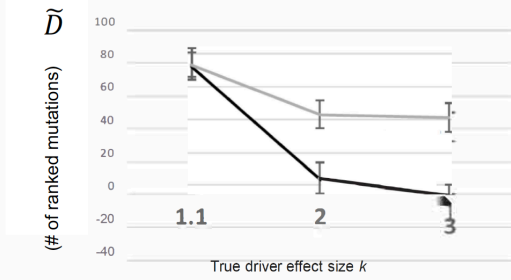

**d** Absolute median distance from true driver under a 'BnD' model for different scalar  $k$

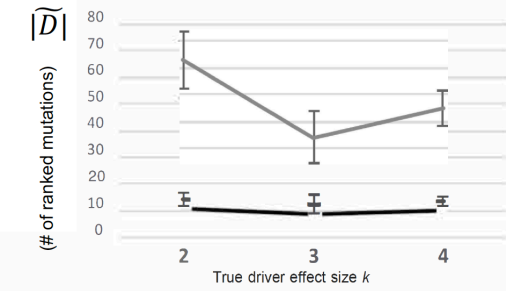

182

**e** Adjusting window size using neutral simulations

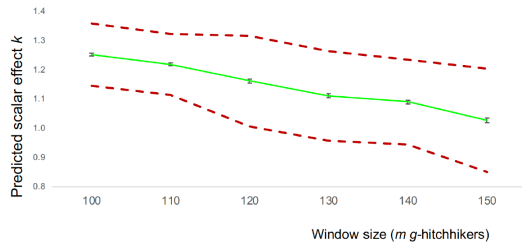

**f** Overlap between neutral and non neutral simulations

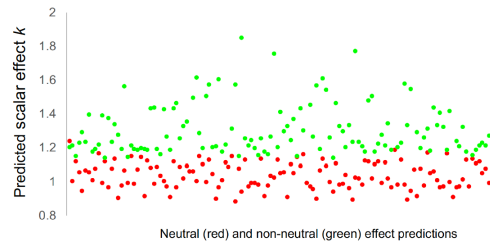

**g** Absolute median distance between predicted and true driver position within predicted effect range

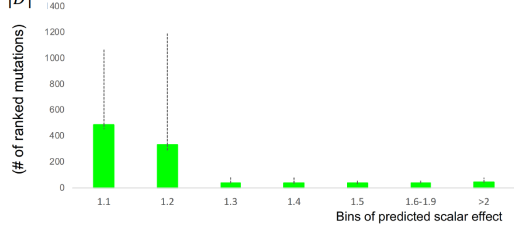

**h** Absolute median distance between predicted and simulated driver position using a sliding window of 10 mutations ranked on predicted scalar  $k$  effect

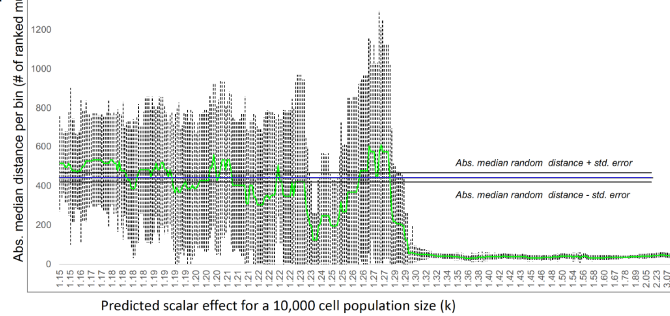

183

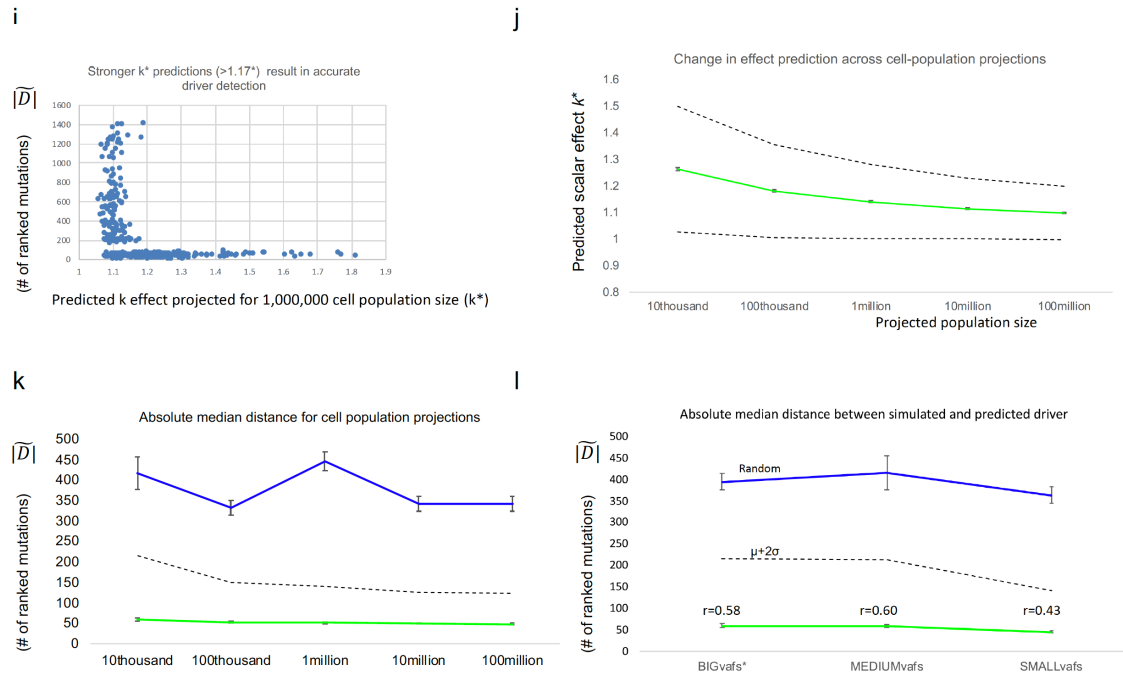

184  
 185 **Supplementary figure 1. Predicting driver position and scalar effect  $k$  using simulations.** To test our  
 186 model, we used various types of simulations with sampling noise including exponential stochastic growth,  
 187 exponential growth with biological restrictions in replication timing and birth and death (BnD) Gillespie  
 188 stochastic model. For every simulation, we introduced a driver mutation with a true/known fitness effect.  
 189 Further, we “sequenced” the population assigning each mutation with a population frequency. Then,  
 190 based on mutational frequencies we estimated the predicted driver’s position and effect (across the  
 191 ordered mutations). By ‘distance from true driver’ we denote the number of mutations between the true  
 192 and the predicted driver position. In **a**) we show the predicted growth and effect peak (simulated effect  
 193  $k=3$ ) for one simulation, where mutations are ordered based on their frequency and the predicted peak  
 194 corresponds to the exact position of the true driver. In **b**) We show the median predicted value across a  
 195 range of  $k$  effect sizes using three different growth models. **c**) To test if we can significantly predict the  
 196 driver’s position/timing, we measured the median and **d**) the absolute median distance (as in number of  
 197 mutations) between predicted and true driver. We were able to successfully approximate the driver’s  
 198 position (in black) compared to random (in grey) for various effect sizes. In **e**) Using Julie software from  
 199 Williams et al 2016, we generated 140 neutral simulations of tumor progression for a population of 10000

200 cells. Neutral peaks using an optimal window size of  $m=150$  hitchhikers had a median scalar effect  $k$  of  
201 1.03,  $2\times\sigma=0.18$  (dotted lines) and median standard error equal to 0.01 (capped bars). In **f**) we show the  
202 overlap between neutral and non-neutral simulations. Scalar effect predictions for neutral (red dots) and  
203 non-neutral (green dots) simulations showed a small overlap. Neutral effect peaks have a median  $\tilde{k}$  equal  
204 to 1.03. In **g**) we show that stronger drivers result in accurate detection of driver's position (within effect  
205 range). By implementing the Williams et al 2018 algorithm for stochastic tumor progression we simulated  
206 360 tumor progressions with a populations size of 10000 cells. We estimated the absolute median  
207 distance (and 95% deviation) between the simulated and predicted driver using bins of various scalar  $k$   
208 effect sizes. Dotted lines represent a  $2\times\sigma$  deviation (95%). When our method predicted a higher than  
209 1.29 scalar  $k$  for the specific population size, driver detection became highly accurate. For random  
210 mutations selected from the same samples the absolute median distance is 444.5, with a standard error of  
211 the median  $\pm 24.5$ . In **h**) after ranking simulations based on the predicted scalar effect  $k$  for every  
212 simulation (from smallest to highest effect) we used a sliding window of size 20 to estimate the absolute  
213 median distance (and 95% deviation) between the simulated and predicted driver per bin of 20. Dotted  
214 lines represent a  $2\times\sigma$  deviation (95%). When our predicted scalar effect  $k$  was higher than 1.29 our  
215 driver detection was highly accurate. Blue line represents our random absolute median distance (444.5),  
216 while black lines represent the standard error of the median for these expectation ( $\pm 24.5$ ). In **i**) Each dot  
217 represents a single simulation. We plot the absolute distance between simulated and predicted driver in  
218 association with the predicted effect  $k^*$ . A large effect denotes the presence of a driver with great  
219 accuracy (small  $|D|$ ). In **j**) we show the predicted driver effect across various population projections. By  
220 implementing the Williams et al 2018 algorithm for stochastic tumor progression we simulated 360 tumor  
221 progressions with a populations size of 10000 cells. By directly modifying the total population size in  
222 equation [1] in our algorithm, we then predicted the drivers' median effect by projecting onto larger  
223 population sizes. Capped error bars represent the standard error of the median, while dotted lines  
224 represent a  $2\times\sigma$  deviation (95%). Adjusting our model for larger population sizes decreased the scalar

225 effect prediction. In **k**) similarly to (j) we also predicted the driver position in larger population sizes.  
226 Green line represents the absolute median distance (as in number of ranked mutations) between predicted  
227 and simulated drivers. Blue line represents the absolute median distance between each simulation's  
228 random prediction and the simulated driver. Capped error bars represent the median standard error, while  
229 dotted lines represent a  $2\times\sigma$  deviation (95%). Adjusting our model for larger population sizes did not  
230 burden our method. In contrast, our result showed a slight improvement in driver detections. Finally, in **l**)  
231 we predicted the driver position for simulated drivers with high, medium or low VAF. Green line  
232 represents the absolute median distance between predicted and simulated drivers. Blue line represents the  
233 absolute median distance between each simulation's random prediction and the simulated driver.  
234 Simulated drivers with smaller allele frequencies showed a lower potential in predicting the driver's effect  
235 (lower correlation between simulated and predicted effect). Interestingly, they also provided driver  
236 detections with higher accuracy (absolute median distance between simulated and predicted driver equal  
237 to 46 ranked mutations, compared to 60 and 59.5 for higher and medium VAFs).  
238

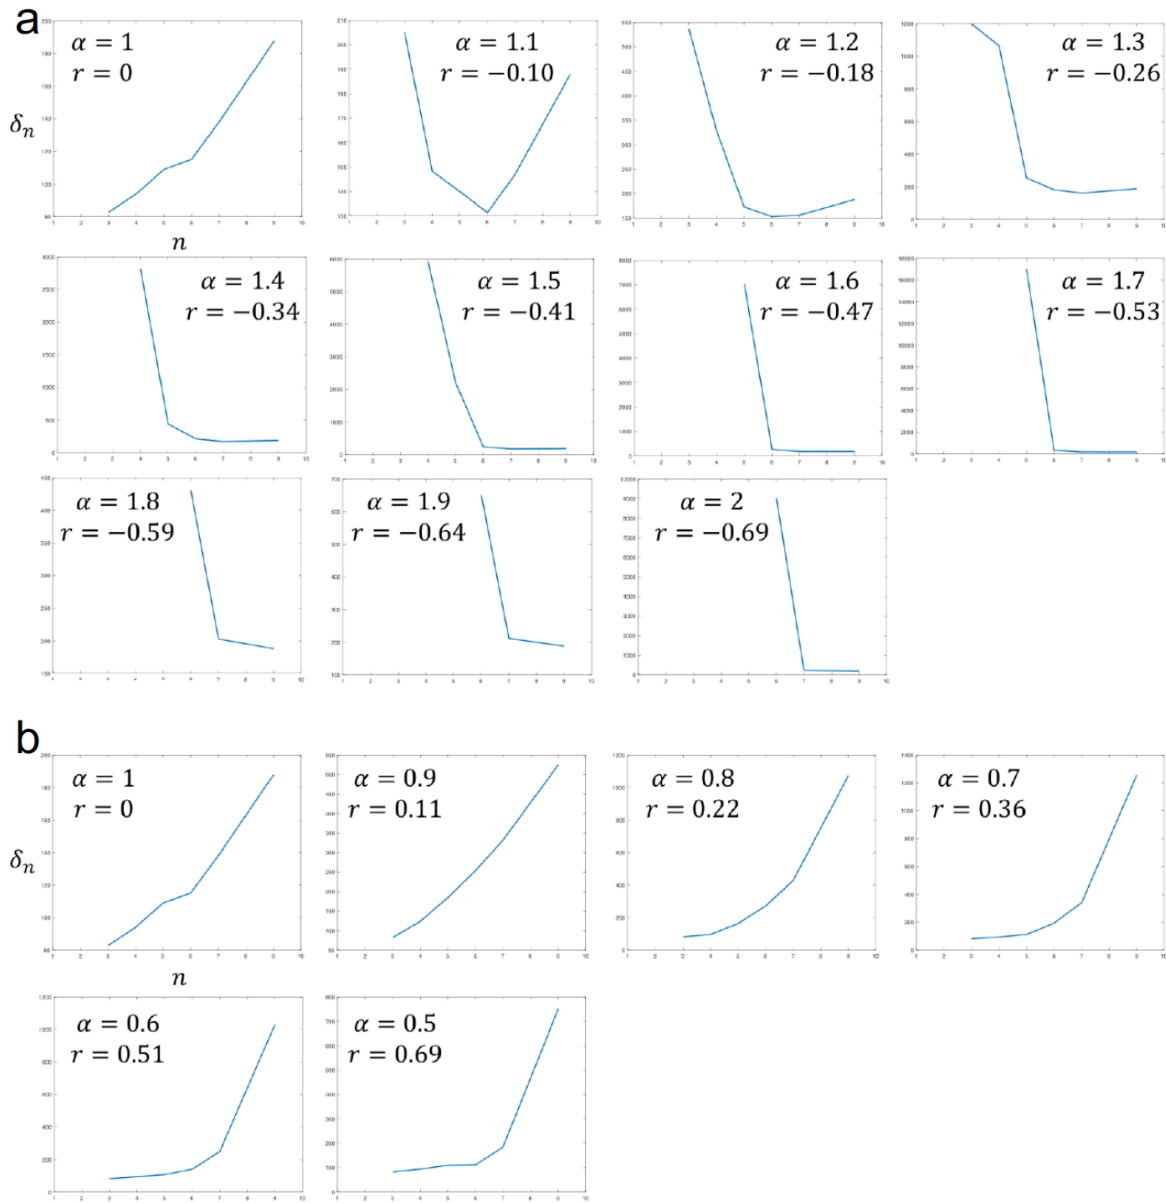

239

240

**Supplementary figure 2.** Using Kingman's coalescent theory, for a length of time  $T_n$  with  $n$  lineages,

241

we show that the growth  $\hat{r}$  estimator remains qualitatively unchanged (positive or negative) even for non

242

g-hitchhikers. By approximation, the mutational density  $\delta_n$  within windows  $[1/n \ 1/(n-1))$ , whose

243

lengths are  $L_n$  is equal to  $\delta_n = \frac{M_n}{L_n} \propto 2\mu n$ . As mutational density  $\delta_n$  increases with  $n$ , and hence with

244

time,  $\hat{r}$  estimator is predicted to take positive values for both constant and varying size populations.

245

Similarly, for negative growth values, density  $\delta_n$  decreases with time. A small positive bias is observed in

246 cases of growth  $r=0$ , as the pattern reverses. Using a population model  $N^{t+1} = \alpha N^t$ , we let **(A)**  $\alpha > 1$   
 247 corresponding to a decreasing population (time is indexed in reverse) and **(B)**  $\alpha < 1$  corresponding to an  
 248 increasing population.

249

250

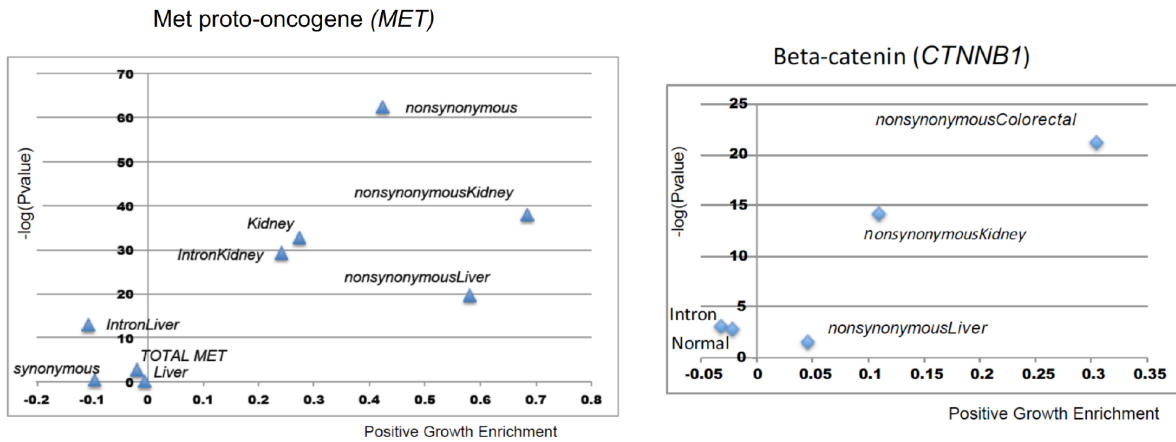

251

252 **Supplementary figure 3.** Both *MET* and *CTNNB1* genomic regions appear to be slightly depleted during  
 253 periods of positive growth, whereas nonsynonymous mutations show positive associations for specific  
 254 cancers. The x-axis represents growth enrichment, while the y-axis shows the level of significance as the  
 255 negative logarithm of a two tailed t-test P value ( $-\log(\text{p-value})$ ).

256

### BCL-2 mutations

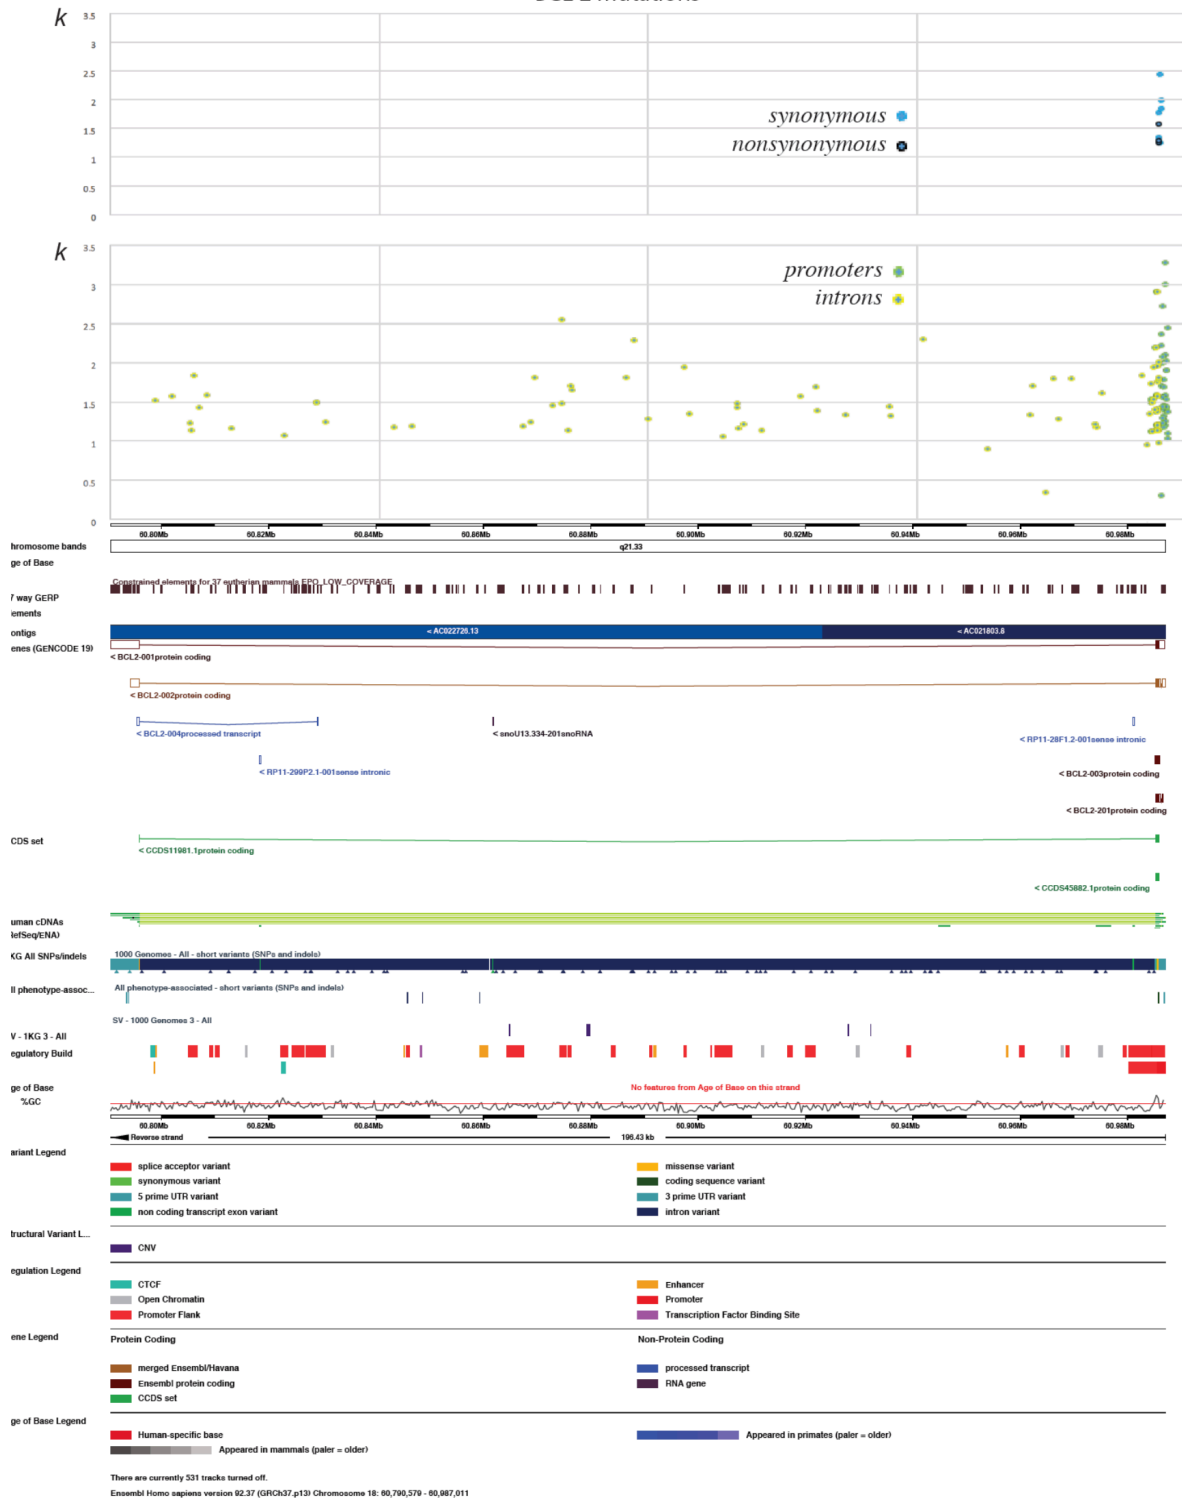

257

258 **Supplementary figure 4.** Mapping of missense, nonsynonymous, promoter, synonymous and intronic

259 mutations from 993 tumor samples across the *BCL2*'s genomic region. Interestingly, synonymous

260 mutations placed at an early mutational hotspot was associated with periods of positive growth. Genomic  
 261 profile for *BCL2* was obtained from ENSEMBL (<http://www.ensembl.org>).

262

263

|              |         |      |      |         |      |               |              |            |             |               |             |       |        |
|--------------|---------|------|------|---------|------|---------------|--------------|------------|-------------|---------------|-------------|-------|--------|
| Effect range | 0.8-1   | 0    | 0    | 0       | 0.2  | 0             | 0            | 0          | 0           | 0             | 0           | 0     | 0      |
|              | 1-1.2   | 0    | 0    | 0.6     | 0.2  | 0.1           | 0            | 0.1        | 0.1         | 0             | 0.1         | 0     | 0.1    |
|              | 1.2-1.4 | 0.3  | 0.3  | 0       | 0.3  | 0.1           | 0.1          | 0.1        | 0.2         | 0.1           | 0           | 0     | 0.1    |
|              | 1.4-1.6 |      | 0.3  | 0       | 0    | 0.1           | 0.1          | 0.1        | 0           | 0.1           | 0.1         | 0.1   | 0.2    |
|              | 1.6-1.8 | 0    | 0    | 0       | 0    | 0             | 0.1          | 0          | 0           | 0             | 0.1         | 0.1   | 0.1    |
|              | 1.8-2   | 0.3  | 0    | 0       | 0    | 0             | 0            | 0          | 0           | 0             | 0           | 0     | 0      |
|              |         | CPS1 | GLI1 | COL18A1 | IDH1 | MAP3K1 Intron | FBXW7 Intron | CBL Intron | GNAS Intron | NOTCH2 Intron | MSH2 Intron | CSF1R | PTPN11 |

264

265 **Supplementary figure 5.** Using 993 tumor samples, we identified candidate genes that were associated  
 266 with positive growth from an AML ultra-deep sequenced tumor that showed an overall positive  
 267 association with positive growth for enrichment different effect bins. Dark boxes denote significance for  
 268 the specific effect range/bin using a two tailed t-test and  $P < 0.00001$ .

269

270 **Supplementary References**

271 1. Sabarinathan, R. *et al.* The whole-genome panorama of cancer drivers. *bioRxiv* (2017).  
 272 doi:10.1101/190330

273 2. Vogelstein, B. *et al.* Cancer genome landscapes. *Science* **339**, 1546–58 (2013).

274 3. Jiao, W., Vembu, S., Deshwar, A. G., Stein, L. & Morris, Q. Inferring clonal evolution of  
 275 tumors from single nucleotide somatic mutations. *BMC Bioinformatics* (2014).  
 276 doi:10.1186/1471-2105-15-35

277 4. Gillespie, D. T. A general method for numerically simulating the stochastic time evolution  
 278 of coupled chemical reactions. *J. Comput. Phys.* (1976). doi:10.1016/0021-  
 279 9991(76)90041-3

280 5. Williams, M. J. *et al.* Quantification of subclonal selection in cancer from bulk sequencing



281 data. *Nat. Genet.* (2018). doi:10.1038/s41588-018-0128-6  
282 6. Williams, M. J., Werner, B., Barnes, C. P., Graham, T. A. & Sottoriva, A. Identification of  
283 neutral tumor evolution across cancer types. *Nat. Genet.* (2016). doi:10.1038/ng.3489  
284
