# Supplementary material for: Estimating growth patterns and driver effects in tumor evolution from individual samples
Source: Springer Nature journal article supplement (doi:10.1038/s41467-020-14407-9), 2020-02-05
Supplement: 41467_2020_14407_MOESM3_ESM.pdf [file 41467_2020_14407_MOESM3_ESM.pdf]

## **Descriptions of Additional Supplementary Files**

File Name: Supplementary Data 1

Description: Positive Enrichment and  $\delta k$  for 293 genes.

File Name: Supplementary Data 2

Description: Gene ontology (GO) enrichment for genes with positive growth during tumor progression.
